# Supplementary material
Source: PubMed Central journal article supplement (PMC6777124)
Supplement: ao9b02310_si_001.pdf [file ao9b02310_si_001.pdf]

# Electrically Conductive Gels Prepared from Syndiotactic Polystyrene and an Ionic Liquid

*Hideyuki Itagaki,\*<sup>1,2</sup> Naoto Yoshida,<sup>1</sup> Takumi Sano,<sup>2</sup> Mayu Yokoyama,<sup>1</sup> Nozomi Iba,<sup>1</sup>*

*Ryotaro Sugiyama<sup>1</sup> and Masakatsu Kuroki<sup>3</sup>*

<sup>1</sup>Department of Chemistry, School of Education, Shizuoka University,

<sup>2</sup>Department of Chemistry, Graduate School of Science and Technology, Shizuoka University,

836 Ohya, Suruga-ku, Shizuoka 422-8529, Japan

<sup>3</sup>R & D Laboratory, Taica Corporation, 789 Miyakami, Shimizu-ku, Shizuoka 424-0911, Japan

Tel: +81-54-238-4627, Fax: +81-54-237-3354, E-mail: itagaki.hideyuki@shizuoka.ac.jp

## Supporting data

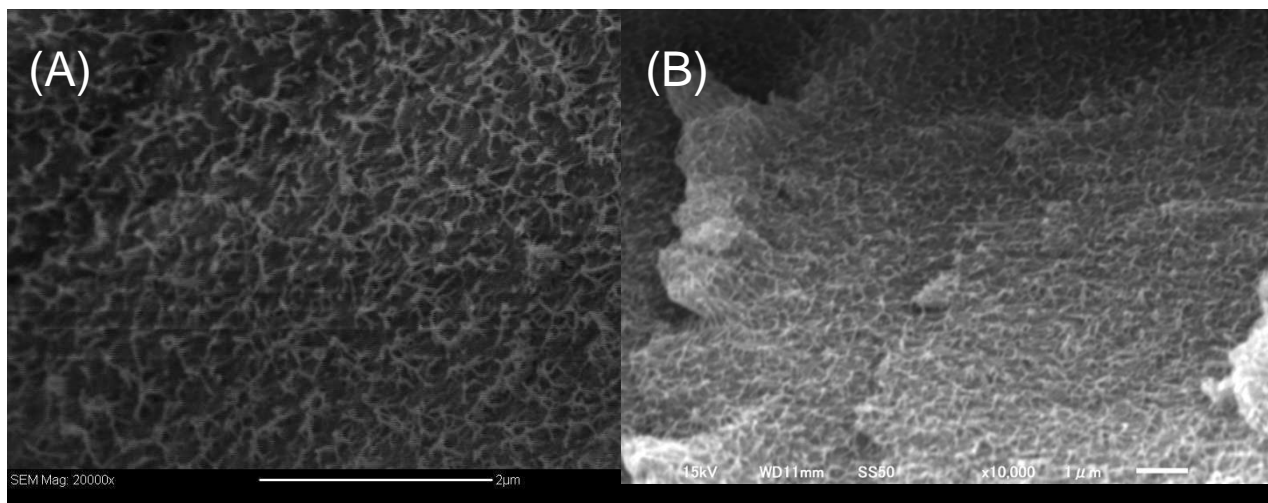

Figure S1.

SEM pictures of (A) dried SPS/Py gel (magnification, 20,000 fold) and (B) dried SPS/Py/[C<sub>4</sub>py]Br gel after washing with methanol (magnification, 10,000 fold).

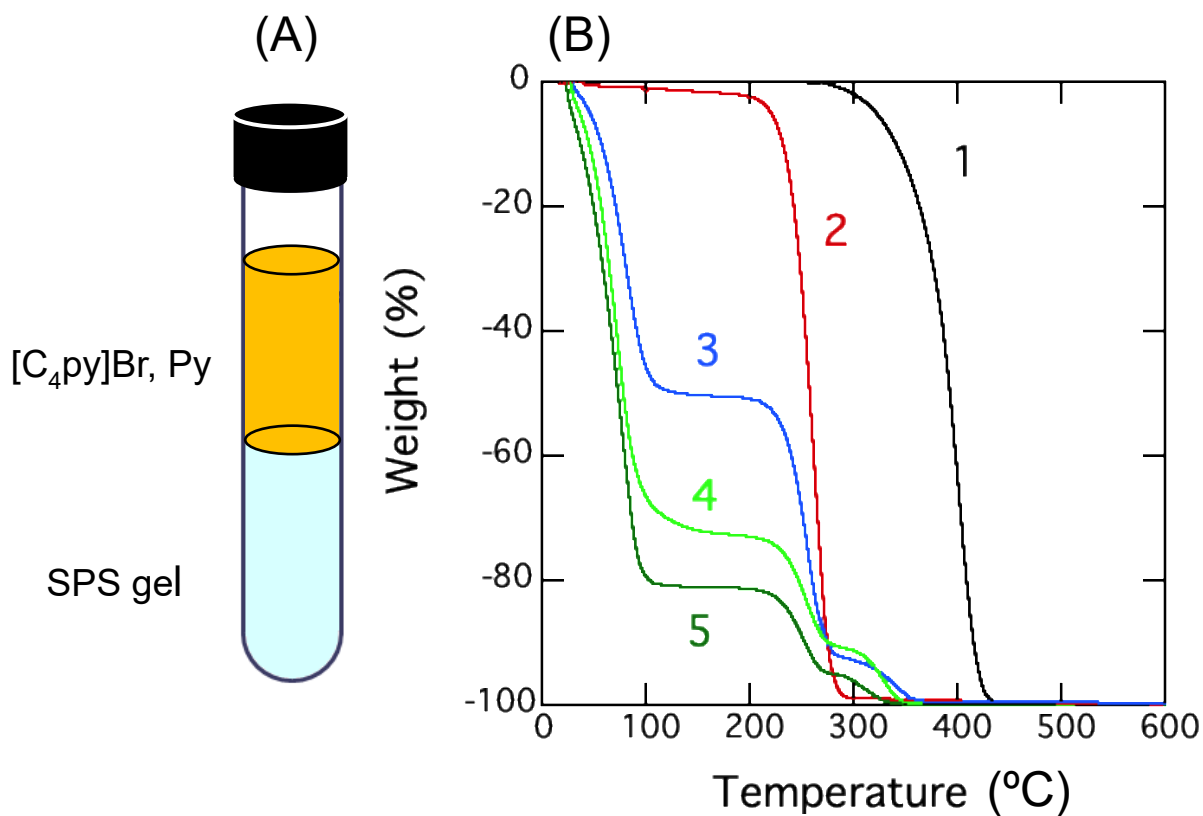

Figure S2.

(A) Image of how to mount  $[C_4py]Br$  or  $[C_4py]Br/Py$  on an SPS gel. (B) Thermogravimetry traces of SPS/Py/ $[C_4py]Br$  gels at a scan rate of  $10\text{ }^\circ\text{C}/\text{min}$ : 1. SPS pellet, 2. ILBr, 3~5. SPS gels after the mount of ILBr or Py solutions of ILBr for 1 week on SPS/Py/ $[C_4py]Br$  gels where SPS was 5 wt% and the weight ratio between Py and ILBr was 9:1. The mounting solution was; 3. ILBr only, 4. ILBr:Py=5:5, 5. ILBr:Py=2:8 (weight ratio).

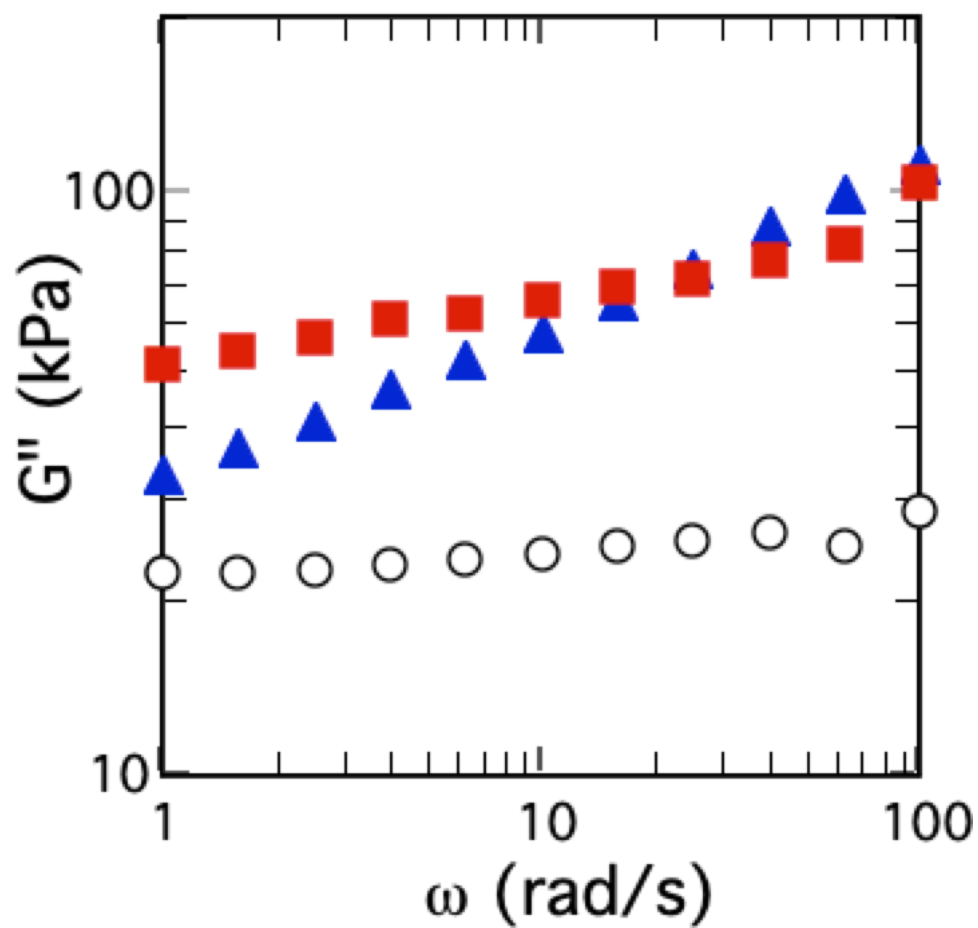

Figure S3.

Frequency dependence of the loss elastic modulus,  $G''$ , of SPS/Py/[C<sub>4</sub>py]Br gel [the fractions of [C<sub>4</sub>py]Br were 35 (black circle) and 41 wt% (red square)] and SPS/Py gels (blue triangle) at 25 °C: the SPS concentrations of all the gels were 5 wt%.
